# Supplementary material for: Mechanical suppression of osteolytic bone metastases in advanced breast cancer patients: a randomised controlled study protocol evaluating safety, feasibility and preliminary efficacy of exercise as a targeted medicine
Source: Springer Nature journal article supplement (doi:10.1186/s13063-018-3091-8), 2018-12-01
Supplement: MOESM3 [file 16356032]

## Prone Exercises

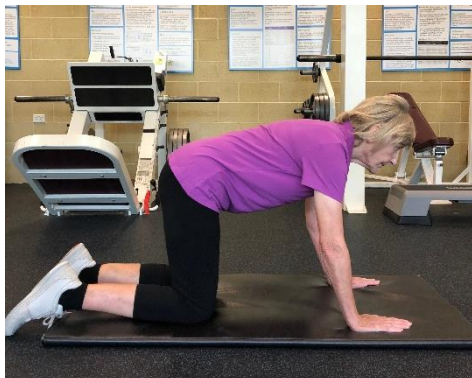

**(Start Position)**

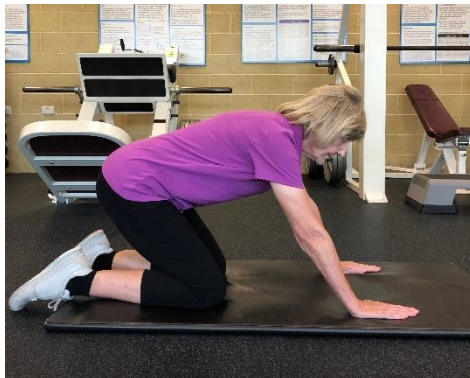

**Hip Hinge**

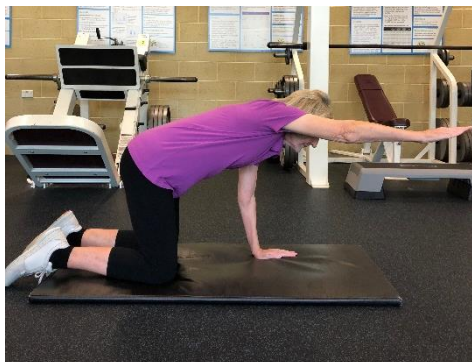

**Arm Extension**

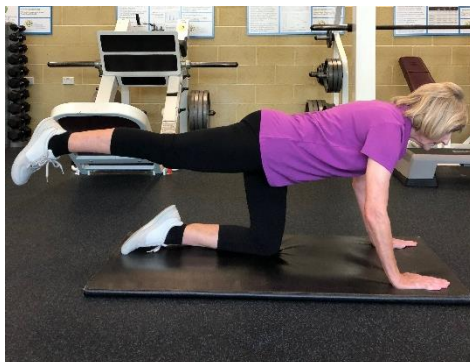

**Leg Extension**

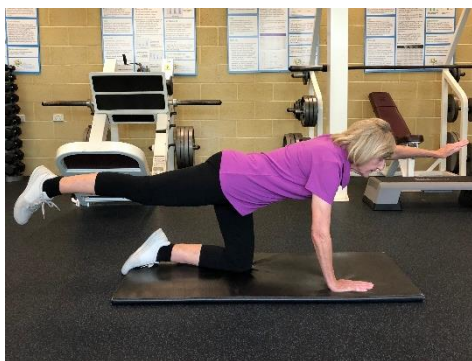

**Arm and Leg Extension**

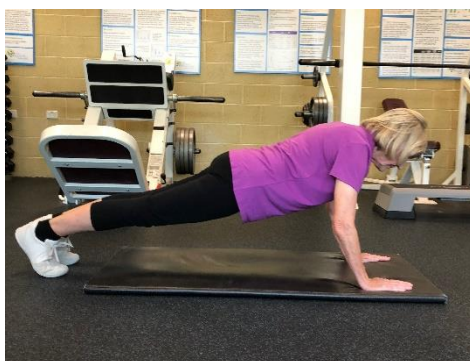

**Prone Plank**

## Supine Exercises

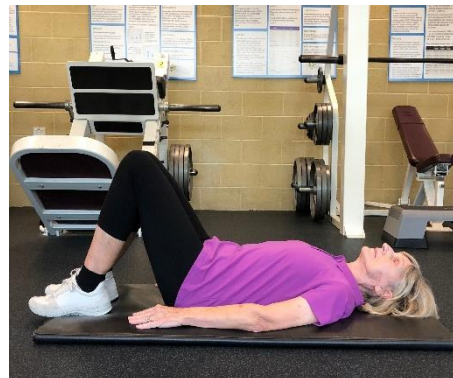

**(Start Position)**

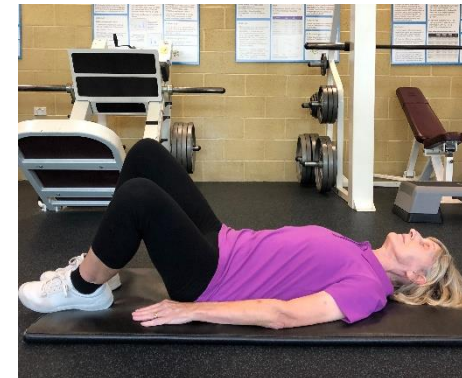

**Leg Fall Out**

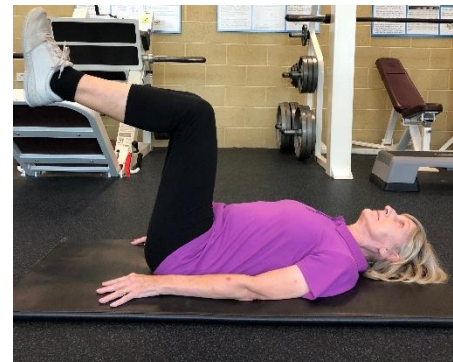

**Double Leg Raise**

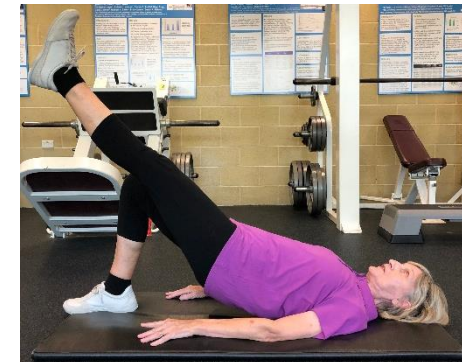

**Single Hip Extension**

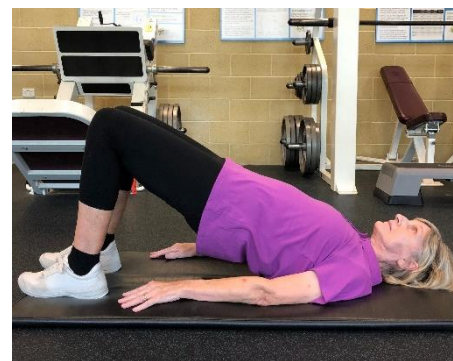

**Full Hip Extension**

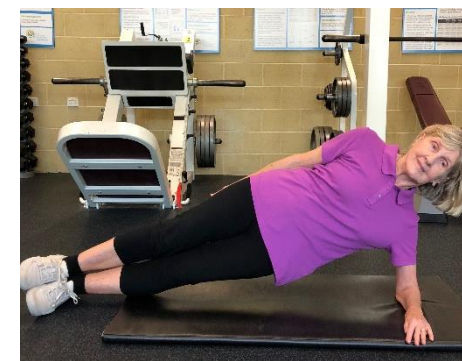

**Side Bridge**

**Supplementary Figure 3.** Photographic examples of prone (left) and supine (right) floor-based spinal isometric exercises, illustrating the start position and final hold positions of each labelled exercise to assist exercise physiologists and cancer patients. The patient in-set was approached in order to obtain these photos explicitly for this manuscript, and has signed a media release consent form.
